# Supplementary material
Source: publisher figshare collection journal article supplement (https://sage.figshare.com/ndownloader/files/17722541)
Supplement: Supplementary file 1 [file 17722541]

Supplemental Table S1: Participant demographics and demographics of the school in which the participants work.

|                                                                    | <i>n</i> (%) |
|--------------------------------------------------------------------|--------------|
| <b>Participant demographics</b>                                    |              |
| <b>Job</b>                                                         |              |
| Middle school teacher                                              | 532 (37.5)   |
| High school teacher                                                | 618 (43.5)   |
| Administrator                                                      | 270 (19.0)   |
| <b>Age</b>                                                         |              |
| 18 to 24 years                                                     | 102 (7.2)    |
| 25 to 29 years                                                     | 223 (15.7)   |
| 30 to 39 years                                                     | 417 (29.4)   |
| 40 to 49 years                                                     | 318 (22.5)   |
| 50+ years                                                          | 356 (25.1)   |
| <b>School demographics</b>                                         |              |
| <b>Region</b>                                                      |              |
| Midwest                                                            | 338 (23.8)   |
| Northeast                                                          | 336 (23.7)   |
| South                                                              | 418 (29.4)   |
| West                                                               | 328 (23.1)   |
| <b>Percentage of students qualifying for free or reduced lunch</b> |              |
| 0-25% (low poverty)                                                | 263 (19.4)   |
| 26-50% (low-mid poverty)                                           | 363 (26.8)   |
| 51-75% (mid-high poverty)                                          | 320 (23.6)   |
| 76-100% (high poverty)                                             | 409 (30.2)   |
| <b>Town size</b>                                                   |              |
| Less than 50,000 people                                            | 681 (48.2)   |
| Greater than or equal to 50,000 people                             | 732 (51.8)   |
